# Supplementary material for: Elemental characterisation of melanin in feathers via synchrotron X-ray imaging and absorption spectroscopy
Source: PubMed Central journal article supplement (PMC5034265; doi:10.1038/srep34002), 2016-09-23
Supplement: srep34002-s1.pdf [file srep34002-s1.pdf]

1 **Elemental characterisation of melanin in feathers via synchrotron X-ray imaging and**  
2 **absorption spectroscopy – Supplementary Information**

3  
4 Nicholas P. Edwards\*<sup>1,2</sup>, Arjen van Veelen<sup>1,2</sup>, Jennifer Anné<sup>1,2</sup>, Phillip L. Manning<sup>2,3</sup>, Uwe  
5 Bergmann<sup>4</sup>, William I. Sellers<sup>1,2</sup>, Victoria M. Egerton<sup>2,3</sup>, Dimosthenis Sokaras<sup>5</sup>, Roberto  
6 Alonso-Mori<sup>6</sup>, Kazumasa Wakamatsu<sup>7</sup>, Shosuke Ito<sup>7</sup>, Roy A. Wogelius<sup>1,2</sup>

7  
8 <sup>1</sup>University of Manchester, School of Earth and Environmental Sciences, Williamson Research Centre for Molecular  
9 Environmental Science, M13 9PL, UK

10 <sup>2</sup>University of Manchester, School of Earth and Environmental Sciences, Interdisciplinary Centre for Ancient Life,  
11 Manchester M13 9PL, UK

12 <sup>3</sup>College of Charleston, Department of Geology and Environmental Geosciences, Charleston, SC, 29424, USA

13 <sup>4</sup>Stanford PULSE Institute, SLAC National Accelerator Laboratory, Menlo Park, CA, 94025, USA

14 <sup>5</sup>Stanford Synchrotron Radiation Lightsource, SLAC National Accelerator Laboratory, Menlo Park, CA 94025, USA

15 <sup>6</sup>Linac Coherent Lightsource, SLAC National Accelerator Laboratory, Menlo Park, CA, 94025, USA

16 <sup>7</sup>Department of Chemistry, Fujita Health University and School of Health Sciences, Toyoake, Aichi, Japan

17 \*Corresponding author: nicholas.edwards@manchester.ac.uk

18  
19 **Keywords:** Synchrotron, X-ray, fluorescence, absorption, melanin, feather, fossil

20  
21 **Feathers**

22 All feathers were ethically sourced from captive animals (unreleasable or rehabilitated wildlife). All  
23 feathers analysed at SSRL were obtained from animals under the care of the Live Animal Center  
24 (LAC) at The Academy of Natural Sciences of Drexel University (Philadelphia, PA, USA). The  
25 feathers were naturally dropped via molting and collected by staff of the LAC from the enclosures.  
26 Each feather was placed in a sealed bag and stored in a designated freezer until the date of shipment  
27 for analysis. VET# is a unique LAC number used to track all husbandry and care of the animal. All  
28 birds are fed with feeder chicks, rats and mice, supplemented with Vionate Vitamin/Mineral  
29 Supplement.

30  
31 Feathers used in melanin quantification were again natural molts obtained from captive birds. Harris  
32 Hawk, Eurasian Kestrel and Barn Owl were sourced from the non-profit Wild Wings Birds of Prey  
33 education and rehabilitation centre which was located in Bents Home & Garden, Warrington, UK at  
34 the time of feather sampling, but has since relocated to White Moss Nursery and Garden Centre,  
35 Warrington, UK. The Red-tailed Hawk feather was collected from The Falconry Centre in Hagley,  
36 West Midlands, UK. All birds are fed with feeder chicks.

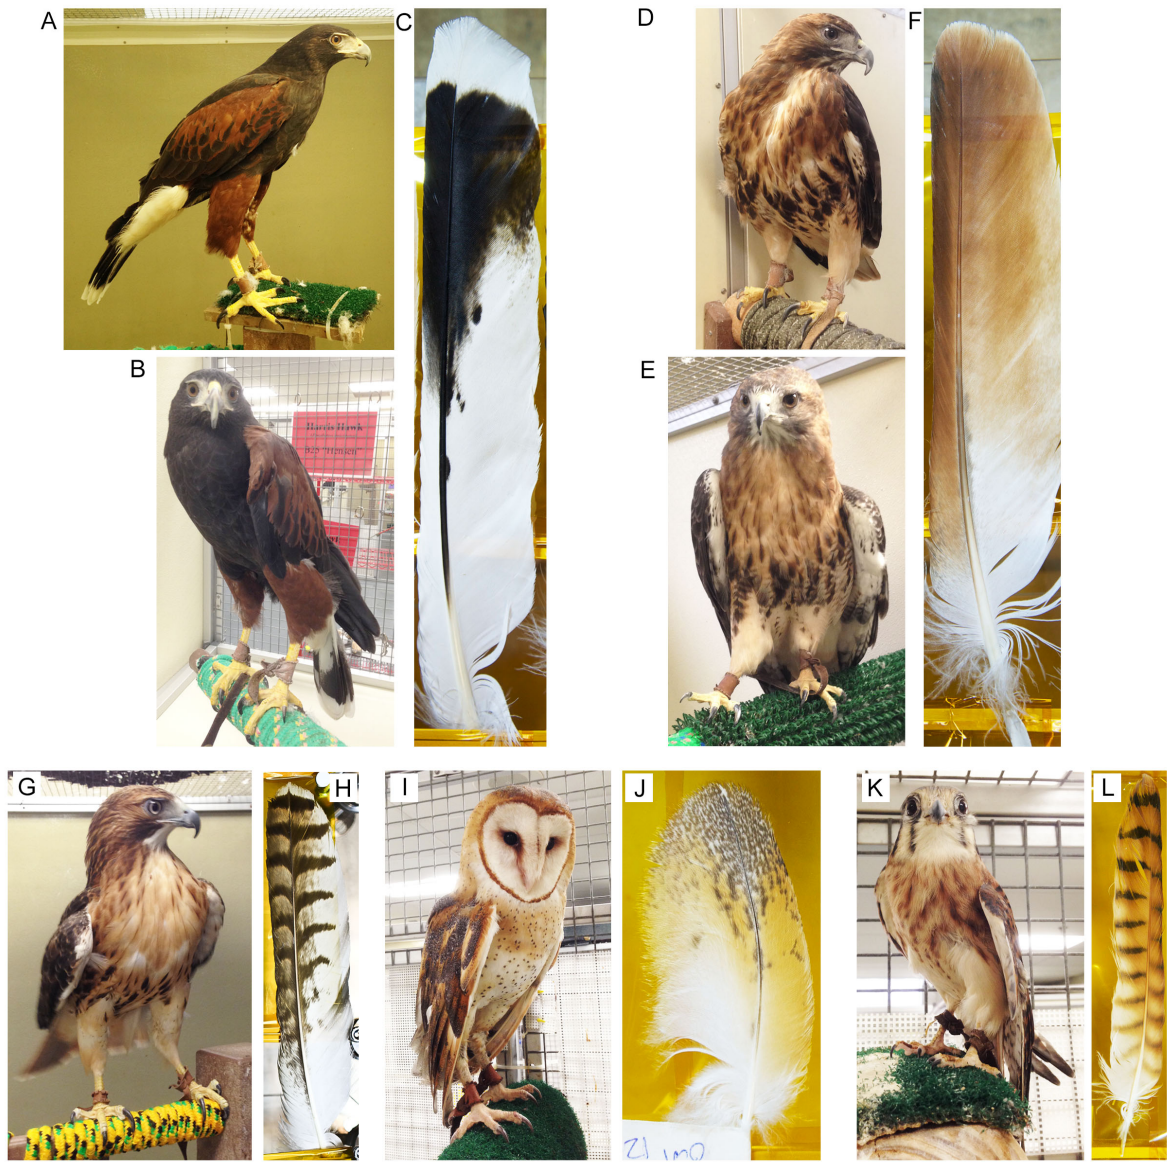

| Species                     | Common Name      | VET # | Call name | Sex | DOB/DOH     | Age at acquisition | Date of Acquisition | Source                                      |
|-----------------------------|------------------|-------|-----------|-----|-------------|--------------------|---------------------|---------------------------------------------|
| <i>Parabuteo unicinctus</i> | Harris Hawk      | B25   | Hensen    | F   | Unknown     | Adult              | 2/19/1997           | Adobe Mountain Wildlife Centre, AZ, USA     |
| <i>Parabuteo unicinctus</i> | Harris Hawk      | B69   | Chase     | F   | Unknown     | Adult              | 11/11/2009          | Adobe Mountain Wildlife Centre, AZ, USA     |
| <i>Buteo jamaicensis</i>    | Red-tailed Hawk  | B33   | Teo       | M   | Unknown     | Young adult        | 8/25/1997           | Avian Rehabilitation, Weymouth, NJ, USA     |
| <i>Buteo jamaicensis</i>    | Red-tailed Hawk  | B32   | Mia       | F   | Unknown     | Adult              | 8/25/1997           | Avian Rehabilitation, Weymouth, NJ, USA     |
| <i>Buteo jamaicensis</i>    | Red-tailed Hawk  | B72   | Hawkeye   | M   | Spring 2012 | Est. 1 year        | 3/17/2013           | Centre Wildlife Care, Port Matilda, PA, USA |
| <i>Tyto alba</i>            | Barn Owl         | B66   | Arizona   | F   | Unknown     | Adult              | 11/11/2009          | Adobe Mountain Wildlife Centre, AZ, USA     |
| <i>Falco sparverius</i>     | American Kestrel | B65   | Sienna    | F   | Unknown     | Adult              | 11/11/2009          | Adobe Mountain Wildlife Centre, AZ, USA     |

37

38

39 **Supplementary Figure 1.** Optical images of the source animals and feathers from the LAC analysed  
 40 at SSRL. (A) Harris Hawk, VET# B25, (B) Harris Hawk, VET# B69, (C) analysed tail feather,  
 41 sourced from either B25 or B69, uncertainty due to these individuals sharing an enclosure, collected  
 42 January 2014. (D) Red-tailed Hawk VET# B32, (E) Red-tailed Hawk VET# B33, (F) analysed tail  
 43 feather, sourced from either B32 or B33, uncertainty due to these individuals sharing an enclosure,  
 44 collected August 2014. (G) subadult Red-tailed Hawk VET# B72, (H) analysed tail feather, collected  
 45 January 2014. (I) Barn Owl, VET# B66, (J) analysed body feather. (K) American Kestrel VET# B65,  
 46 (L) analysed tail feather, collected January 2014.

47

48 **Supplementary Table 1.** Melanin content of feathers. These analyses were performed according to  
 49 the methods outlined in (1-4). Note that UK feathers were analysed with the red-tailed hawk being the  
 50 purely red feather comparable to figure S1b. Correlation between TM (x) and EM+PM (y) is y=  
 51  $0.961x+1.51$  ( $R^2 = 0.966$ ).

| Sample          | Color | Solue-ne-350 solubilization (ng/mg) |        | H2O2 oxidation (ng/mg) |      | HI hydrolysis (ng/mg) | Various ratios |               |               |
|-----------------|-------|-------------------------------------|--------|------------------------|------|-----------------------|----------------|---------------|---------------|
|                 |       | A500                                | A650   | PTCA                   | TTCA | 4-AHP                 | A650/A500      | TTCA/PTCA     | 4-AHP/PTCA    |
| Harris Hawk     | Dark  | 0.6295                              | 0.2195 | 711                    | 299  | 6.4                   | 0.349          | 0.42          | 0.01          |
|                 | White | 0.0015                              | 0.0005 | 0.0                    | 11.8 | 2.9                   | Not applicable | Not available | Not available |
| Kestrel         | Dark  | 0.482                               | 0.1535 | 591                    | 268  | 109                   | 0.318          | 0.45          | 0.18          |
|                 | Red   | 0.326                               | 0.0425 | 117                    | 1193 | 1170                  | 0.130          | 10.20         | 10.00         |
| Barn Owl        | Dark  | 0.135                               | 0.043  | 171                    | 35.2 | 17.5                  | 0.319          | 0.21          | 0.10          |
|                 | Red   | 0.055                               | 0.012  | 57.0                   | 105  | 416                   | 0.218          | 1.84          | 7.30          |
|                 | White | 0.0065                              | 0.002  | 7.2                    | 47.8 | 7.5                   | Not applicable | 6.64          | 1.04          |
| Red Tailed Hawk | Red   | 0.246                               | 0.024  | 80.3                   | 1161 | 1067                  | 0.098          | 14.46         | 13.29         |
|                 | White | 0.006                               | 0.0015 | 6.0                    | 14.7 | 9.5                   | Not applicable | 2.45          | 1.58          |

TTCA = thiazole-2,4,5-tricarboxylic acid  
 PTCA = pyrrole-2,3,5-tricarboxylic acid  
 4-AHP = 4-amino-3-hydroxyphenylalanine

| Sample          | Color | TM = A500x101* or 215** (µg/mg) | EM = PTCA x 0.08 (µg/mg) | BZ-PM = TTCA x 0.034 (µg/mg) | BH-PM = 4-AHP x 0.007 (µg/mg) | Melanin = EM + BZ-PH + BH-PM (µg/mg) | PM = (BZ-PM) + (BH-PM) (µg/mg) |
|-----------------|-------|---------------------------------|--------------------------|------------------------------|-------------------------------|--------------------------------------|--------------------------------|
| Harris Hawk     | Dark  | 63.58                           | 56.88                    | 10.17                        | 0.04                          | 67.09                                | 10.21                          |
|                 | White | 0.15                            | 0.00                     | 0.40                         | 0.02                          | 0.42                                 | 0.42                           |
| Kestrel         | Dark  | 48.68                           | 47.28                    | 9.11                         | 0.76                          | 57.16                                | 9.88                           |
|                 | Red   | 70.09                           | 9.36                     | 40.56                        | 8.19                          | 58.11                                | 48.75                          |
| Barn Owl        | Dark  | 13.64                           | 13.68                    | 1.20                         | 0.12                          | 15.00                                | 1.32                           |
|                 | Red   | 11.83                           | 4.56                     | 3.57                         | 2.91                          | 11.04                                | 6.48                           |
|                 | White | 0.66                            | 0.58                     | 1.63                         | 0.05                          | 2.25                                 | 1.68                           |
| Red Tailed Hawk | Red   | 52.89                           | 6.42                     | 39.47                        | 7.47                          | 53.37                                | 46.94                          |
|                 | White | 0.61                            | 0.48                     | 0.50                         | 0.07                          | 1.05                                 | 0.57                           |

\* = for EM  
 \*\* = for PM



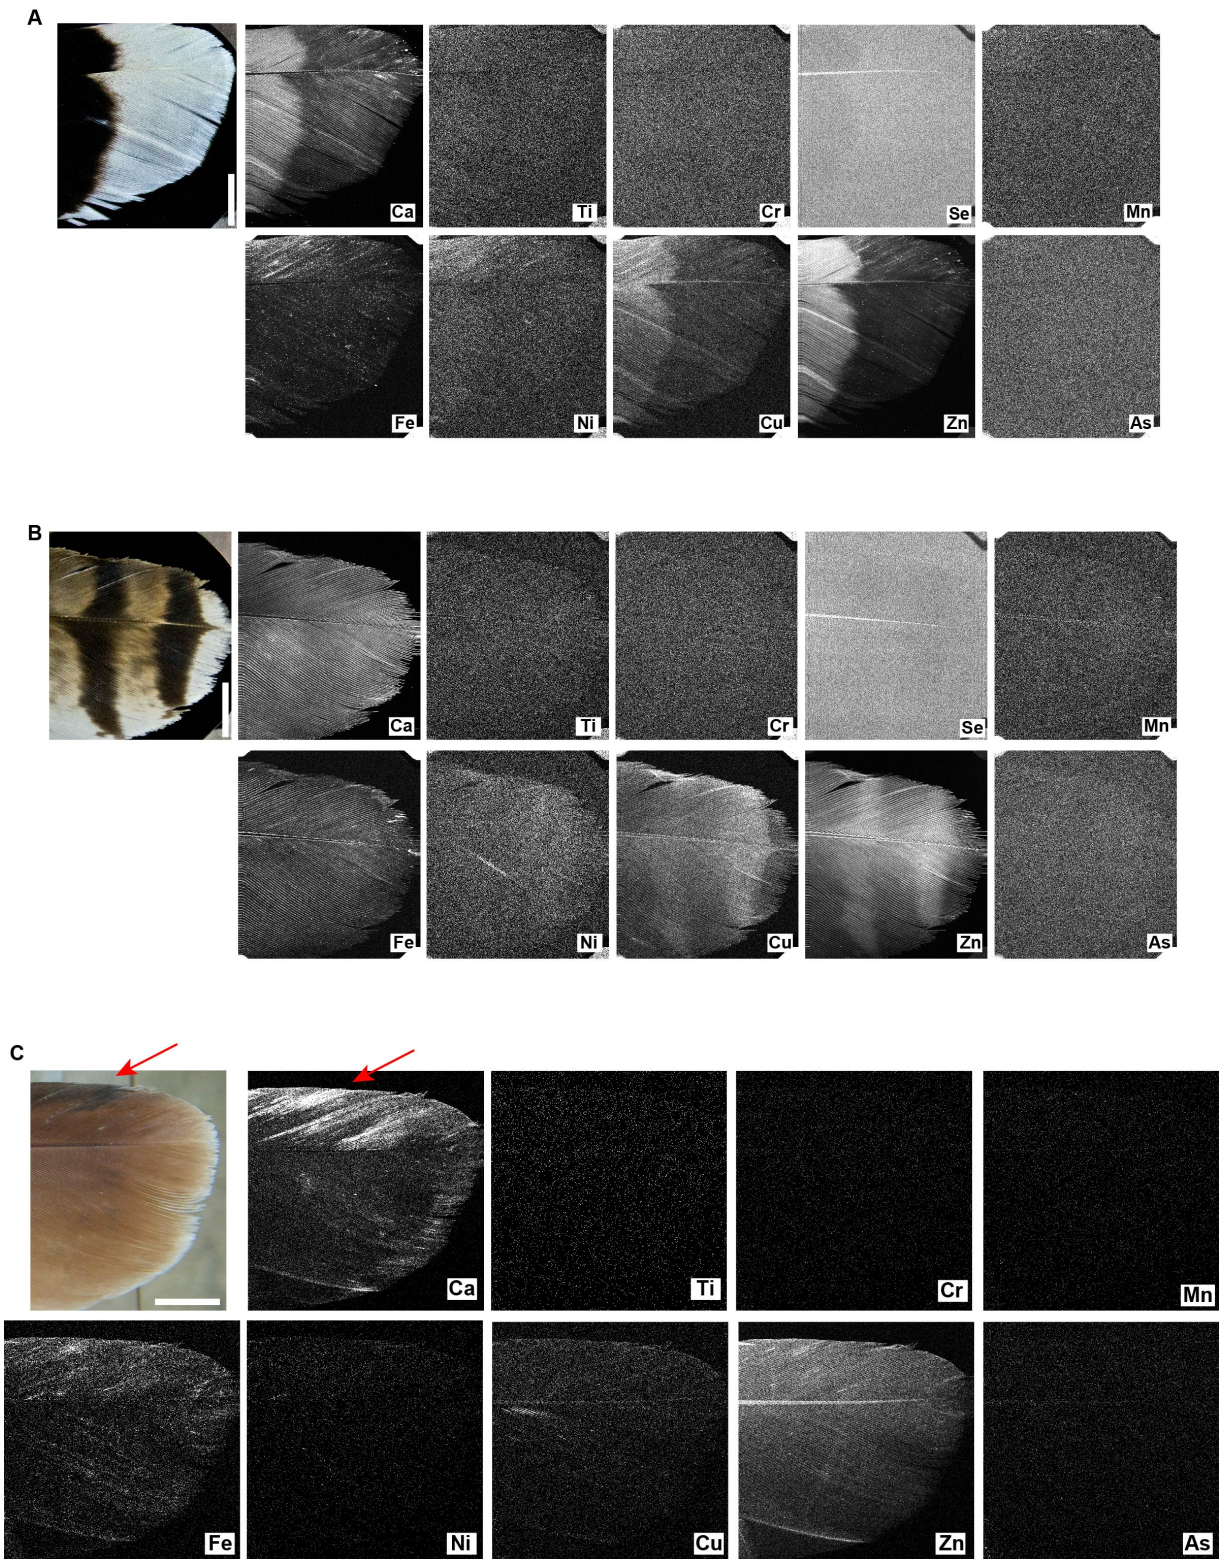

53 **Supplementary Figure 2-1.** SRS-XRF maps of all elements in A) Harris hawk, B) striped red-tailed  
 54 hawk and C) non-striped red-tailed hawk. Red arrows indicate darker regions with high Ca. Scale bars  
 55 = 1cm.

56

57

58



A

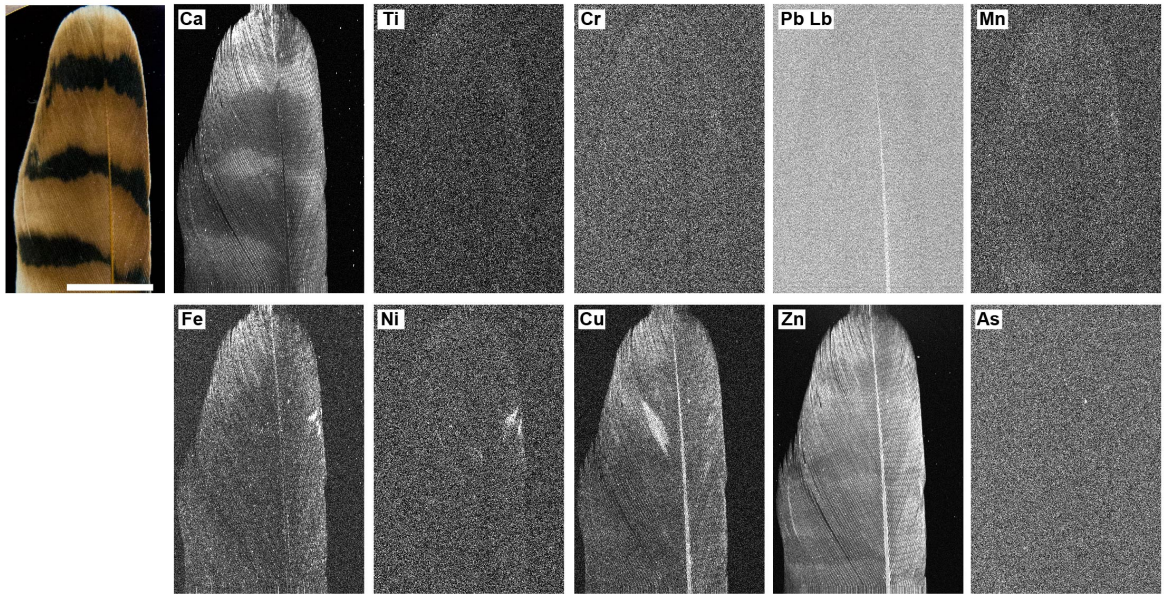

B

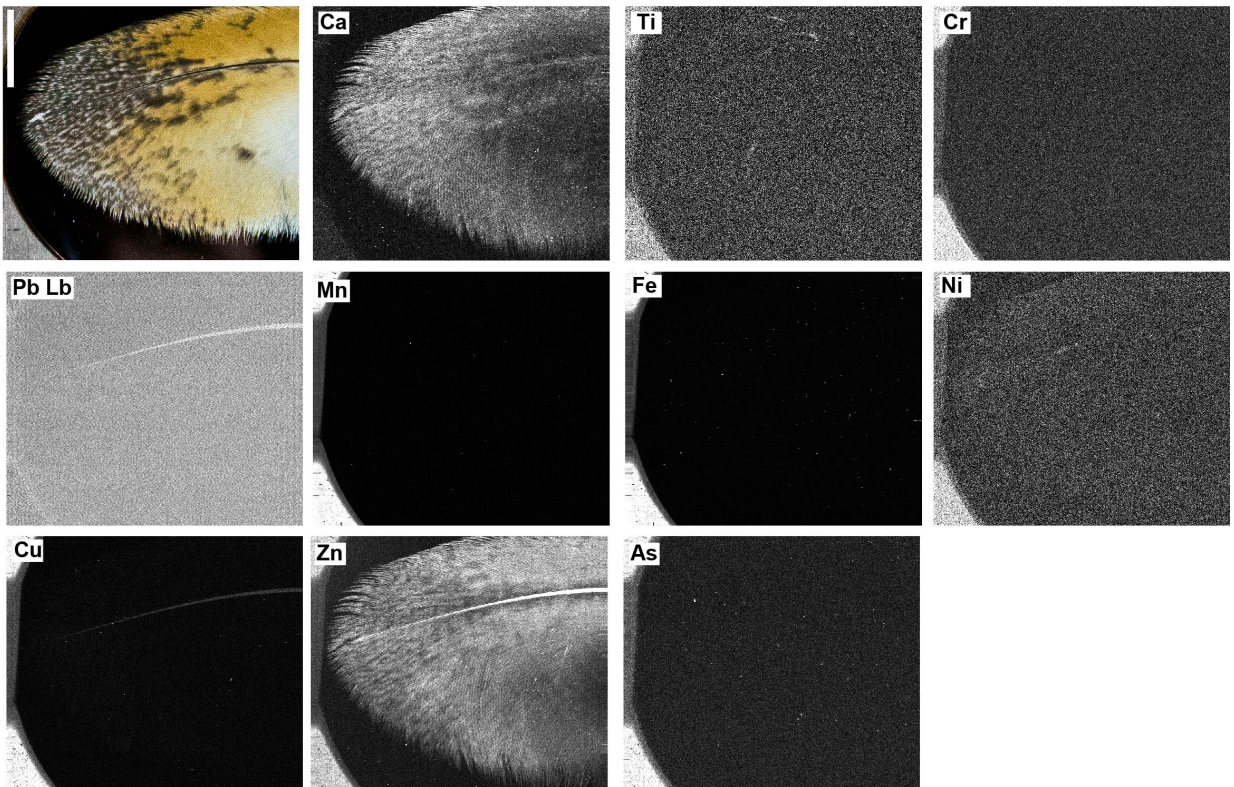

59

60

61 **Supplementary Figure 2-2.** SRS-XRF maps of all elements mapped in A) American kestrel and B)

62 barn owl. Scale bars = 1 cm.

63

64

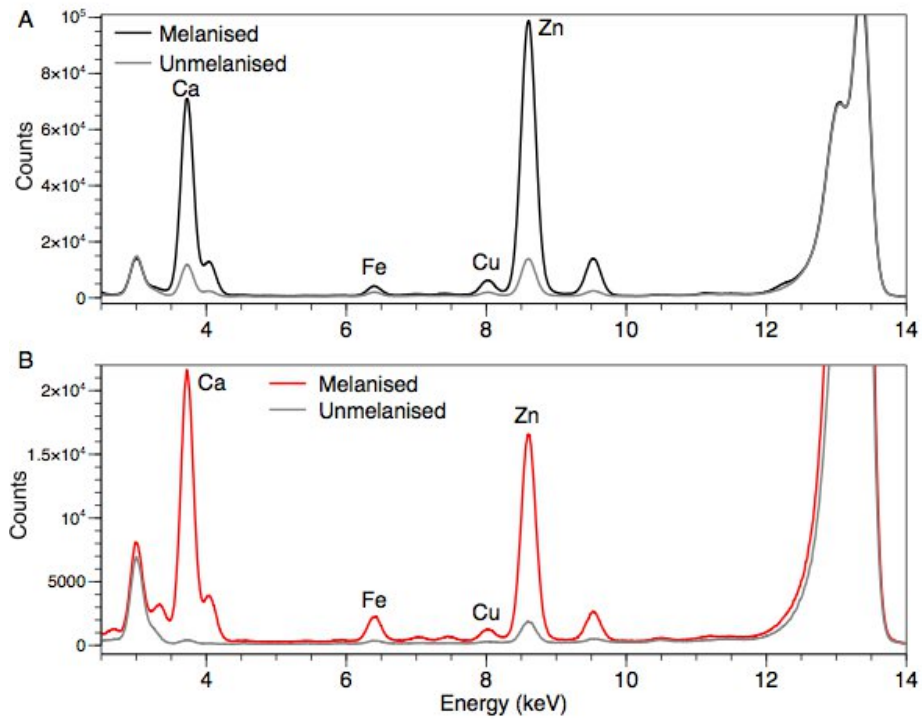

65 **Supplementary Figure 3.** Example synchrotron XRF EDS spectra of A) Harris Hawk and B) Red-  
 66 tailed Hawk.

67

68

69

70

71 **Supplementary Table 2.** SXRF EDS of all elements detected within feathers. All values in parts per  
 72 million (ppm) with  $2\sigma$  errors in parantheses. Data fit using PyMCA (5) from fundamental parameters.

| Species         | Colour | S            | Ca         | Ti    | Cr    | Mn    | Fe     | Ni    | Cu     | Zn       | As    | Se    |
|-----------------|--------|--------------|------------|-------|-------|-------|--------|-------|--------|----------|-------|-------|
| Harris hawk     | Black  | 33477 (1606) | 6421 (389) | 7 (1) | 1 (1) | 1 (1) | 26 (2) | 0     | 12 (1) | 186 (10) | 1 (1) | 1 (1) |
|                 | White  | 25542 (1315) | 1960 (159) | 5 (1) | 1 (1) | 0     | 10 (1) | 1 (1) | 5 (1)  | 37 (3)   | 1 (1) | 1 (1) |
| kestrel         | Black  | 19423 (896)  | 1574 (123) | 2 (1) | 1 (1) | 1 (1) | 5 (1)  | 1 (1) | 2 (1)  | 25 (2)   | 1 (1) | 1 (1) |
|                 | Red    | 13550 (685)  | 989 (85)   | 2 (1) | 1 (1) | 1 (1) | 5 (1)  | 1 (1) | 3 (1)  | 49 (3)   | 1 (1) | 1 (1) |
| barn owl        | Black  | 11812 (515)  | 733 (73)   | 3 (1) | 1 (1) | 1 (1) | 3 (1)  | 1 (1) | 1 (1)  | 43 (3)   | 1 (1) | 1 (1) |
|                 | Red    | 27833 (1005) | 423 (47)   | 3 (1) | 1 (1) | 1 (1) | 4 (1)  | 1 (1) | 1 (1)  | 47 (3)   | 1 (1) | 1 (1) |
|                 | White  | 12059 (521)  | 137 (18)   | 3 (1) | 1 (1) | 1 (1) | 3 (1)  | 1 (1) | 1 (1)  | 25 (2)   | 1 (1) | 1 (1) |
| red-tailed hawk | Red    | 28853 (1181) | 2060 (160) | 2 (1) | 1 (1) | 1 (1) | 8 (1)  | 1 (1) | 2 (1)  | 32 (3)   | 0 (1) | 1 (1) |
|                 | White  | 23343 (954)  | 35 (7)     | 2 (1) | 1 (1) | 0 (1) | 1 (1)  | 0 (1) | 0 (1)  | 6 (1)    | 0 (1) | 0 (1) |
| Striped red     | Brown  | 77307 (3793) | 4315 (287) | 6 (1) | 1 (1) | 2 (1) | 31 (3) | 1 (1) | 17 (2) | 226 (11) | 1 (1) | 1 (1) |
| tailed hawk     | White  | 51813 (2801) | 1144 (107) | 3 (1) | 0 (1) | 1 (1) | 6 (1)  | 0 (1) | 4 (1)  | 31 (3)   | 1 (1) | 1 (1) |

73  
74



75 **Supplementary Figure 4.** Representative fitting statistics exported by PyMCA.

**Spectrum, Continuum and Fitted values :**

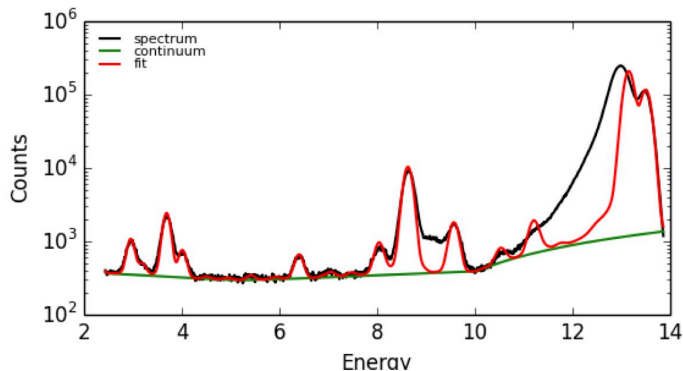

**Fit Parameters :**

| FIT parameters             |                               |
|----------------------------|-------------------------------|
| Region of Fit              | 250 - 1380                    |
| Number of iterations       | 1                             |
| Chi square                 | 6482.0627                     |
| Last Chi square difference | 724046406.4801 %              |
| Calibration parameters     |                               |
| Zero                       | -8.79617E-02 +/- -8.79617E-02 |
| Gain                       | 1.01060E-02 +/- 1.01060E-02   |
| Noise                      | 1.50000E-01 +/- 1.50000E-01   |
| Fano                       | 1.20000E-01 +/- 1.20000E-01   |
| Sum                        | 0.00000E+00 +/- 0.00000E+00   |
| Peak shape parameters      |                               |
| ST AreaR                   | 3.50000E-02 +/- 3.50000E-02   |
| ST SlopeR                  | 2.50000E-01 +/- 2.50000E-01   |
| LT AreaR                   | 0.00000E+00 +/- 0.00000E+00   |
| LT SlopeR                  | 1.00000E+01 +/- 1.00000E+01   |
| STEP HeightR               | 0.00000E+00 +/- 0.00000E+00   |
| Continuum parameters       |                               |
| Type                       | Strip Background              |
| Strip Constant             | 1.00000                       |
| Strip Iterations           | 20000                         |
| Strip Width                | 4                             |
| Smoothing Filter Width     | 10                            |

**Concentrations:**

| Element | Group | Fit Area     | Sigma Area | M         | a s s f r a c t i o n | Layer0 |
|---------|-------|--------------|------------|-----------|-----------------------|--------|
| Ar      | K     | 1.637619e+04 | 1.72e+02   | 0.01602   | 0.01602               |        |
| Ca      | K     | 4.907065e+04 | 2.50e+02   | 0.0042    | 0.0042                |        |
| Ti      | K     | 5.415252e+02 | 1.11e+02   | 9.408e-06 | 9.408e-06             |        |
| V       | K     | 3.544807e+02 | 1.11e+02   | 3.314e-06 | 3.314e-06             |        |
| Cr      | K     | 1.039197e+03 | 1.14e+02   | 5.544e-06 | 5.544e-06             |        |
| Mn      | K     | 3.512201e+02 | 1.12e+02   | 1.205e-06 | 1.205e-06             |        |
| Fe      | K     | 8.645846e+03 | 1.48e+02   | 1.964e-05 | 1.964e-05             |        |
| Ni      | K     | 9.899093e+02 | 1.18e+02   | 1.268e-06 | 1.268e-06             |        |
| Cu      | K     | 1.523698e+04 | 1.73e+02   | 1.582e-05 | 1.582e-05             |        |
| Zn      | K     | 2.638458e+05 | 5.22e+02   | 0.0002191 | 0.0002191             |        |
| As      | K     | 8.293948e+03 | 1.69e+02   | 4.543e-06 | 4.543e-06             |        |
| Se      | K     | 3.494618e+04 | 2.47e+02   | 1.791e-05 | 1.791e-05             |        |

76

77

## Fit Peak Results:

| Element       | Group         | Fit Area            | Sigma               | Energy          | Ratio   | FWHM  | Chi square |
|---------------|---------------|---------------------|---------------------|-----------------|---------|-------|------------|
| Ar            | <b>K</b>      | <b>1.637619e+04</b> | <b>1.72e+02</b>     |                 |         |       |            |
|               | KL3           | 1.354776e+04        | 1.47e+02            | 2.957           | 0.82728 | 0.173 | 5.17       |
|               | KM3           | 2.828429e+03        | 3.07e+01            | 3.190           | 0.17272 | 0.175 | 3.43       |
|               | KL3 Si_KM3esc | 4.544048e+00        | 4.93e-02            | 1.121           | 0.00035 | 0.159 | 0.00       |
|               | KL3 Si_KL3esc | 1.547234e+02        | 1.68e+00            | 1.217           | 0.01182 | 0.160 | 0.00       |
|               | KM3 Si_KM3esc | 8.761060e-01        | 9.51e-03            | 1.354           | 0.00032 | 0.161 | 0.00       |
|               | KM3 Si_KL3esc | 2.965263e+01        | 3.22e-01            | 1.450           | 0.01085 | 0.162 | 0.00       |
| Ca            | <b>K</b>      | <b>4.907065e+04</b> | <b>2.50e+02</b>     |                 |         |       |            |
|               | KL3           | 4.045270e+04        | 2.13e+02            | 3.690           | 0.82438 | 0.179 | 35.27      |
|               | KM3           | 8.617950e+03        | 4.54e+01            | 4.013           | 0.17562 | 0.181 | 22.12      |
|               | KL3 Si_KM3esc | 1.048440e+01        | 5.52e-02            | 1.855           | 0.00027 | 0.165 | 0.00       |
|               | KL3 Si_KL3esc | 3.505733e+02        | 1.85e+00            | 1.951           | 0.00897 | 0.166 | 0.00       |
|               | KM3 Si_KM3esc | 1.985784e+00        | 1.05e-02            | 2.177           | 0.00024 | 0.168 | 0.00       |
|               | KM3 Si_KL3esc | 6.593018e+01        | 3.47e-01            | 2.273           | 0.00792 | 0.168 | 0.53       |
| Ti            | <b>K</b>      | <b>5.415252e+02</b> | <b>1.11e+02</b>     |                 |         |       |            |
|               | KL3           | 4.545733e+02        | 9.67e+01            | 4.509           | 0.83943 | 0.185 | 0.97       |
|               | KM3           | 8.695189e+01        | 1.85e+01            | 4.932           | 0.16057 | 0.187 | 1.02       |
|               | KL3 Si_KM3esc | 8.682059e-02        | 1.85e-02            | 2.673           | 0.00020 | 0.171 | 2.04       |
|               | KL3 Si_KL3esc | 2.853917e+00        | 6.07e-01            | 2.769           | 0.00650 | 0.172 | 3.08       |
|               | KM3 Si_KM3esc | 1.416038e-02        | 3.01e-03            | 3.096           | 0.00017 | 0.174 | 4.04       |
|               | KM3 Si_KL3esc | 4.620851e-01        | 9.83e-02            | 3.192           | 0.00550 | 0.175 | 3.43       |
| V             | <b>K</b>      | <b>3.544807e+02</b> | <b>1.11e+02</b>     |                 |         |       |            |
|               | KL3           | 2.997193e+02        | 9.75e+01            | 4.950           | 0.84552 | 0.188 | 1.04       |
|               | KM3           | 5.476141e+01        | 1.78e+01            | 5.427           | 0.15448 | 0.191 | 1.41       |
|               | KL3 Si_KM3esc | 4.848483e-02        | 1.58e-02            | 3.114           | 0.00017 | 0.175 | 4.05       |
|               | KL3 Si_KL3esc | 1.581719e+00        | 5.15e-01            | 3.210           | 0.00546 | 0.175 | 3.65       |
|               | KM3 Si_KM3esc | 7.394894e-03        | 2.41e-03            | 3.591           | 0.00014 | 0.178 | 21.60      |
|               | KM3 Si_KL3esc | 2.395398e-01        | 7.79e-02            | 3.688           | 0.00453 | 0.179 | 35.27      |
| Cr            | <b>K</b>      | <b>1.039197e+03</b> | <b>1.14e+02</b>     |                 |         |       |            |
|               | KL3           | 8.891340e+02        | 1.01e+02            | 5.412           | 0.85560 | 0.191 | 1.42       |
|               | KM3           | 1.500625e+02        | 1.70e+01            | 5.947           | 0.14440 | 0.194 | 1.08       |
|               | KL3 Si_KM3esc | 1.207762e-01        | 1.37e-02            | 3.576           | 0.00014 | 0.178 | 19.03      |
|               | KL3 Si_KL3esc | 3.913088e+00        | 4.43e-01            | 3.672           | 0.00456 | 0.179 | 35.04      |
|               | KM3 Si_KM3esc | 1.672441e-02        | 1.89e-03            | 4.111           | 0.00012 | 0.182 | 5.86       |
|               | KM3 Si_KL3esc | 5.383056e-01        | 6.10e-02            | 4.207           | 0.00371 | 0.182 | 2.66       |
| Mn            | <b>K</b>      | <b>3.512201e+02</b> | <b>1.12e+02</b>     |                 |         |       |            |
|               | KL2           | 1.012070e+02        | 3.34e+01            | 5.888           | 0.28816 | 0.194 | 1.15       |
|               | KL3           | 1.995340e+02        | 6.58e+01            | 5.899           | 0.56812 | 0.194 | 1.14       |
|               | KM3           | 5.047908e+01        | 1.67e+01            | 6.490           | 0.14372 | 0.198 | 2.04       |
|               | KL2 Si_KM3esc | 1.152514e-02        | 3.80e-03            | 4.052           | 0.00012 | 0.181 | 17.70      |
|               | KL2 Si_KL3esc | 3.712030e-01        | 1.22e-01            | 4.148           | 0.00380 | 0.182 | 2.72       |
|               | KL3 Si_KM3esc | 2.263043e-02        | 7.47e-03            | 4.063           | 0.00012 | 0.181 | 15.10      |
|               | KL3 Si_KL3esc | 7.287918e-01        | 2.40e-01            | 4.159           | 0.00378 | 0.182 | 2.61       |
|               | KM3 Si_KM3esc | 4.616405e-03        | 1.52e-03            | 4.654           | 0.00009 | 0.186 | 1.00       |
|               | KM3 Si_KL3esc | 1.477731e-01        | 4.87e-02            | 4.751           | 0.00303 | 0.186 | 0.93       |
|               | Fe            | <b>K</b>            | <b>8.645846e+03</b> | <b>1.48e+02</b> |         |       |            |
| KL2           |               | 2.508388e+03        | 4.43e+01            | 6.391           | 0.29013 | 0.197 | 1.74       |
| KL3           |               | 4.933868e+03        | 8.72e+01            | 6.404           | 0.57066 | 0.197 | 1.77       |
| KM3           |               | 1.203590e+03        | 2.13e+01            | 7.058           | 0.13921 | 0.201 | 1.57       |
| KL2 Si_KM3esc |               | 2.377360e-01        | 4.20e-03            | 4.555           | 0.00010 | 0.185 | 1.02       |
| KL2 Si_KL3esc |               | 7.617031e+00        | 1.35e-01            | 4.651           | 0.00314 | 0.186 | 1.00       |
| KL3 Si_KM3esc |               | 4.654310e-01        | 8.22e-03            | 4.568           | 0.00010 | 0.185 | 1.00       |
| KL3 Si_KL3esc |               | 1.491053e+01        | 2.63e-01            | 4.664           | 0.00313 | 0.186 | 0.97       |
| KM3 Si_KM3esc |               | 9.023697e-02        | 1.59e-03            | 5.222           | 0.00008 | 0.189 | 1.26       |
| KM3 Si_KL3esc |               | 2.875295e+00        | 5.08e-02            | 5.318           | 0.00247 | 0.190 | 1.48       |
| Ni            |               | <b>K</b>            | <b>9.899093e+02</b> | <b>1.18e+02</b> |         |       |            |
|               | KL2           | 2.895296e+02        | 3.57e+01            | 7.461           | 0.29248 | 0.204 | 1.35       |
|               | KL3           | 5.676757e+02        | 6.99e+01            | 7.478           | 0.57346 | 0.204 | 1.32       |
|               | KM3           | 1.327040e+02        | 1.64e+01            | 8.265           | 0.13406 | 0.209 | 53.45      |
|               | KL2 Si_KM3esc | 1.895168e-02        | 2.34e-03            | 5.625           | 0.00007 | 0.192 | 1.28       |
|               | KL2 Si_KL3esc | 6.022586e-01        | 7.42e-02            | 5.721           | 0.00215 | 0.193 | 1.32       |
|               | KL3 Si_KM3esc | 3.694716e-02        | 4.55e-03            | 5.642           | 0.00007 | 0.192 | 1.32       |
|               | KL3 Si_KL3esc | 1.174007e+00        | 1.45e-01            | 5.738           | 0.00214 | 0.193 | 1.35       |
|               | KM3 Si_KM3esc | 6.701900e-03        | 8.26e-04            | 6.429           | 0.00005 | 0.197 | 1.83       |
|               | KM3 Si_KL3esc | 2.120745e-01        | 2.61e-02            | 6.525           | 0.00165 | 0.198 | 1.97       |
|               | Cu            | <b>K</b>            | <b>1.523698e+04</b> | <b>1.73e+02</b> |         |       |            |
| KL2           |               | 4.492044e+03        | 5.27e+01            | 8.028           | 0.29481 | 0.208 | 14.27      |
| KL3           |               | 8.779109e+03        | 1.03e+02            | 8.048           | 0.57617 | 0.208 | 15.98      |
| KM3           |               | 1.965827e+03        | 2.30e+01            | 8.905           | 0.12902 | 0.213 | 415.52     |



|                |                       |                     |                 |        |         |       |          |
|----------------|-----------------------|---------------------|-----------------|--------|---------|-------|----------|
|                | KL2 Si_KM3esc         | 2.446812e-01        | 2.87e-03        | 6.192  | 0.00006 | 0.196 | 1.32     |
|                | KL2 Si_KL3esc         | 7.751449e+00        | 9.09e-02        | 6.288  | 0.00179 | 0.196 | 1.48     |
|                | KL3 Si_KM3esc         | 4.751405e-01        | 5.57e-03        | 6.212  | 0.00006 | 0.196 | 1.36     |
|                | KL3 Si_KL3esc         | 1.505086e+01        | 1.76e-01        | 6.308  | 0.00177 | 0.197 | 1.61     |
|                | KM3 Si_KM3esc         | 8.150738e-02        | 9.55e-04        | 7.069  | 0.00004 | 0.202 | 1.58     |
|                | KM3 Si_KL3esc         | 2.572532e+00        | 3.02e-02        | 7.166  | 0.00135 | 0.202 | 1.44     |
| <b>Zn</b>      | <b>K</b>              | <b>2.638458e+05</b> | <b>5.22e+02</b> |        |         |       |          |
|                | KL2                   | 7.799260e+04        | 1.60e+02        | 8.616  | 0.29560 | 0.211 | 223.16   |
|                | KL3                   | 1.521468e+05        | 3.12e+02        | 8.639  | 0.57665 | 0.211 | 246.72   |
|                | KM3                   | 3.370635e+04        | 6.91e+01        | 9.572  | 0.12775 | 0.217 | 78.91    |
|                | KL2 Si_KM3esc         | 3.530617e+00        | 7.24e-03        | 6.780  | 0.00005 | 0.200 | 1.86     |
|                | KL2 Si_KL3esc         | 1.115552e+02        | 2.29e-01        | 6.876  | 0.00148 | 0.200 | 1.68     |
|                | KL3 Si_KM3esc         | 6.838841e+00        | 1.40e-02        | 6.803  | 0.00005 | 0.200 | 1.83     |
|                | KL3 Si_KL3esc         | 2.160637e+02        | 4.43e-01        | 6.899  | 0.00147 | 0.200 | 1.71     |
|                | KM3 Si_KM3esc         | 1.150616e+00        | 2.36e-03        | 7.736  | 0.00004 | 0.206 | 3.94     |
|                | KM3 Si_KL3esc         | 3.623893e+01        | 7.43e-02        | 7.832  | 0.00111 | 0.206 | 8.33     |
| <b>As</b>      | <b>K</b>              | <b>8.293948e+03</b> | <b>1.69e+02</b> |        |         |       |          |
|                | KL2                   | 2.462016e+03        | 5.19e+01        | 10.508 | 0.29684 | 0.222 | 10.21    |
|                | KL3                   | 4.776126e+03        | 1.01e+02        | 10.544 | 0.57586 | 0.223 | 12.03    |
|                | KM3                   | 1.018426e+03        | 2.15e+01        | 11.724 | 0.12279 | 0.229 | 1914.30  |
|                | KN3                   | 3.737964e+01        | 7.88e-01        | 11.864 | 0.00451 | 0.230 | 3243.29  |
|                | KL2 Si_KM3esc         | 6.490481e-02        | 1.37e-03        | 8.672  | 0.00003 | 0.211 | 267.49   |
|                | KL2 Si_KL3esc         | 2.039575e+00        | 4.30e-02        | 8.768  | 0.00086 | 0.212 | 324.71   |
|                | KL3 Si_KM3esc         | 1.247184e-01        | 2.63e-03        | 8.708  | 0.00003 | 0.212 | 283.36   |
|                | KL3 Si_KL3esc         | 3.918879e+00        | 8.26e-02        | 8.804  | 0.00085 | 0.212 | 356.94   |
|                | KM3 Si_KM3esc         | 1.966401e-02        | 4.14e-04        | 9.888  | 0.00002 | 0.219 | 12.34    |
|                | KM3 Si_KL3esc         | 6.166478e-01        | 1.30e-02        | 9.984  | 0.00063 | 0.219 | 10.85    |
|                | KN3 Si_KM3esc         | 6.975801e-04        | 1.47e-05        | 10.028 | 0.00002 | 0.220 | 7.06     |
|                | KN3 Si_KL3esc         | 2.187140e-02        | 4.61e-04        | 10.124 | 0.00061 | 0.220 | 3.09     |
| <b>Se</b>      | <b>K</b>              | <b>3.494618e+04</b> | <b>2.47e+02</b> |        |         |       |          |
|                | KL2                   | 1.038191e+04        | 7.58e+01        | 11.182 | 0.29708 | 0.226 | 119.41   |
|                | KL3                   | 2.008707e+04        | 1.47e+02        | 11.222 | 0.57480 | 0.226 | 159.66   |
|                | KM3                   | 4.246857e+03        | 3.10e+01        | 12.494 | 0.12153 | 0.233 | 43200.32 |
|                | KN3                   | 2.303504e+02        | 1.68e+00        | 12.652 | 0.00659 | 0.234 | 89928.33 |
|                | KL2 Si_KM3esc         | 2.295130e-01        | 1.68e-03        | 9.346  | 0.00002 | 0.216 | 250.53   |
|                | KL2 Si_KL3esc         | 7.203262e+00        | 5.26e-02        | 9.442  | 0.00072 | 0.216 | 169.85   |
|                | KL3 Si_KM3esc         | 4.395272e-01        | 3.21e-03        | 9.386  | 0.00002 | 0.216 | 215.24   |
|                | KL3 Si_KL3esc         | 1.379364e+01        | 1.01e-01        | 9.482  | 0.00071 | 0.216 | 139.86   |
|                | KM3 Si_KM3esc         | 6.829516e-02        | 4.99e-04        | 10.658 | 0.00002 | 0.223 | 20.90    |
|                | KM3 Si_KL3esc         | 2.139648e+00        | 1.56e-02        | 10.754 | 0.00052 | 0.224 | 24.98    |
|                | KN3 Si_KM3esc         | 3.571925e-03        | 2.61e-05        | 10.816 | 0.00002 | 0.224 | 23.37    |
|                | KN3 Si_KL3esc         | 1.118874e-01        | 8.17e-04        | 10.912 | 0.00050 | 0.225 | 41.58    |
| <b>Scatter</b> | <b>Peak000</b>        | <b>2.968575e+06</b> | <b>1.77e+03</b> |        |         |       |          |
|                | Scatter 000           | 2.968575e+06        | 1.83e+03        | 13.500 | 1.00000 | 0.239 | 3103.33  |
|                | Scatter 000 Si_KM3esc | 3.814037e+01        | 2.35e-02        | 11.664 | 0.00001 | 0.229 | 1530.88  |
|                | Scatter 000 Si_KL3esc | 1.193775e+03        | 7.36e-01        | 11.760 | 0.00042 | 0.229 | 2239.53  |
| <b>Scatter</b> | <b>Compton000</b>     | <b>5.268037e+06</b> | <b>2.29e+03</b> |        |         |       |          |
|                | Scatter 000           | 5.268037e+06        | 2.37e+03        | 13.153 | 1.00000 | 0.237 | 58313.61 |
|                | Scatter 000 Si_KM3esc | 7.300999e+01        | 3.29e-02        | 11.317 | 0.00001 | 0.227 | 297.12   |
|                | Scatter 000 Si_KL3esc | 2.285861e+03        | 1.03e+00        | 11.413 | 0.00045 | 0.227 | 498.52   |

80

81

82

83

84

85

## Spectrum, Continuum and Fitted values :

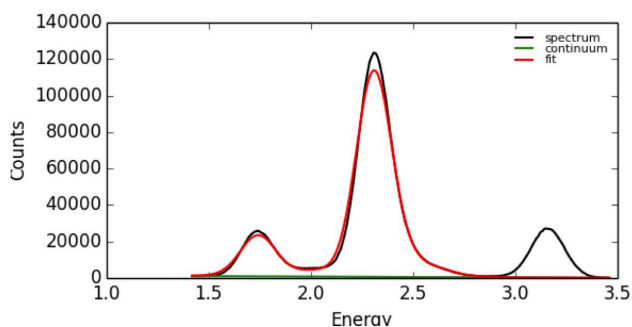

## Fit Parameters :

| FIT parameters             |                               |
|----------------------------|-------------------------------|
| Region of Fit              | 150 - 350                     |
| Number of iterations       | 2                             |
| Chi square                 | 2847.9592                     |
| Last Chi square difference | 56104797.1259 %               |
| Calibration parameters     |                               |
| Zero                       | -1.12093E-01 +/- -1.12093E-01 |
| Gain                       | 1.02033E-02 +/- 1.02033E-02   |
| Noise                      | 2.00000E-01 +/- 2.00000E-01   |
| Fano                       | 1.20000E-02 +/- 1.20000E-02   |
| Sum                        | 0.00000E+00 +/- 0.00000E+00   |
| Peak shape parameters      |                               |
| ST AreaR                   | 3.50000E-02 +/- 3.50000E-02   |
| ST SlopeR                  | 2.50000E-01 +/- 2.50000E-01   |
| LT AreaR                   | 0.00000E+00 +/- 0.00000E+00   |
| LT SlopeR                  | 1.00000E+01 +/- 1.00000E+01   |
| STEP HeightR               | 0.00000E+00 +/- 0.00000E+00   |
| Continuum parameters       |                               |
| Type                       | Strip Background              |
| Strip Constant             | 1.00000                       |
| Strip Iterations           | 20000                         |
| Strip Width                | 4                             |
| Smoothing Filter Width     | 10                            |

## Concentrations:

| Element | Group | Fit Area     | Sigma Area | M         | a s s f r a c t i o n | Layer0 |
|---------|-------|--------------|------------|-----------|-----------------------|--------|
| Al      | K     | 0.000000e+00 | 0.00e+00   | 0         | 0                     |        |
| Si      | K     | 1.385655e+04 | 2.35e+02   | 0.0008861 | 0.0008861             |        |
| P       | K     | 2.594310e+04 | 3.28e+02   | 0.0006497 | 0.0006497             |        |
| S       | K     | 1.947235e+06 | 1.40e+03   | 0.02129   | 0.02129               |        |
| Cl      | K     | 8.586620e+04 | 3.81e+02   | 0.0006206 | 0.0006206             |        |

## Fit Peak Results:

| Element | Group         | Fit Area     | Sigma    | Energy | Ratio   | FWHM  | Chi square |
|---------|---------------|--------------|----------|--------|---------|-------|------------|
| Al      | K             | 0.000000e+00 | 0.00e+00 |        |         |       |            |
|         | KL3           | 0.000000e+00 | 0.00e+00 | 1.487  | 0.98330 | 0.201 | 328.42     |
| Si      | KM3           | 0.000000e+00 | 0.00e+00 | 1.554  | 0.01670 | 0.201 | 285.91     |
|         | K             | 4.845518e+05 | 7.30e+02 |        |         |       |            |
|         | KL3           | 4.682508e+05 | 7.30e+02 | 1.740  | 0.96636 | 0.201 | 210.75     |
| P       | KM3           | 1.630108e+04 | 2.54e+01 | 1.836  | 0.03364 | 0.201 | 106.85     |
|         | K             | 5.056266e+04 | 4.30e+02 |        |         |       |            |
|         | KL3           | 4.795549e+04 | 4.22e+02 | 2.010  | 0.94844 | 0.201 | 363.34     |
| S       | KM3           | 2.607174e+03 | 2.29e+01 | 2.136  | 0.05156 | 0.201 | 473.99     |
|         | KL3 Si_KM3esc | 2.132240e+01 | 1.88e-01 | 0.174  | 0.00046 | 0.200 | 0.00       |
|         | KL3 Si_KL3esc | 7.440874e+02 | 6.55e+00 | 0.270  | 0.01606 | 0.200 | 0.00       |
|         | KM3 Si_KM3esc | 1.120838e+00 | 9.86e-03 | 0.300  | 0.00044 | 0.200 | 0.00       |
|         | KM3 Si_KL3esc | 3.898702e+01 | 3.43e-01 | 0.396  | 0.01548 | 0.200 | 0.00       |
|         | K             | 2.574437e+06 | 1.60e+03 |        |         |       |            |
|         | KL3           | 2.399178e+06 | 1.55e+03 | 2.307  | 0.93192 | 0.201 | 449.11     |
|         | KM3           | 1.752593e+05 | 1.13e+02 | 2.464  | 0.06808 | 0.202 | 136.63     |
|         | KL3 Si_KM3esc | 9.828586e+02 | 6.33e-01 | 0.471  | 0.00042 | 0.200 | 0.00       |
|         | KL3 Si_KL3esc | 3.403453e+04 | 2.19e+01 | 0.568  | 0.01468 | 0.200 | 0.00       |
| Cl      | KM3 Si_KM3esc | 6.857617e+01 | 4.42e-02 | 0.628  | 0.00040 | 0.200 | 0.00       |
|         | KM3 Si_KL3esc | 2.364930e+03 | 1.52e+00 | 0.724  | 0.01397 | 0.200 | 0.00       |
|         | K             | 9.385624e+04 | 4.02e+02 |        |         |       |            |
|         | KL3           | 8.579319e+04 | 3.80e+02 | 2.622  | 0.91409 | 0.202 | 19.04      |
|         | KM3           | 8.063052e+03 | 3.57e+01 | 2.816  | 0.08591 | 0.202 | 1603.67    |
| KM3     | KL3 Si_KM3esc | 3.199878e+01 | 1.42e-01 | 0.786  | 0.00039 | 0.201 | 0.00       |
|         | KL3 Si_KL3esc | 1.098969e+03 | 4.87e+00 | 0.882  | 0.01326 | 0.201 | 0.00       |
|         | KM3 Si_KM3esc | 2.830048e+00 | 1.25e-02 | 0.980  | 0.00036 | 0.201 | 0.00       |
|         | KM3 Si_KL3esc | 9.670925e+01 | 4.29e-01 | 1.076  | 0.01241 | 0.201 | 0.00       |



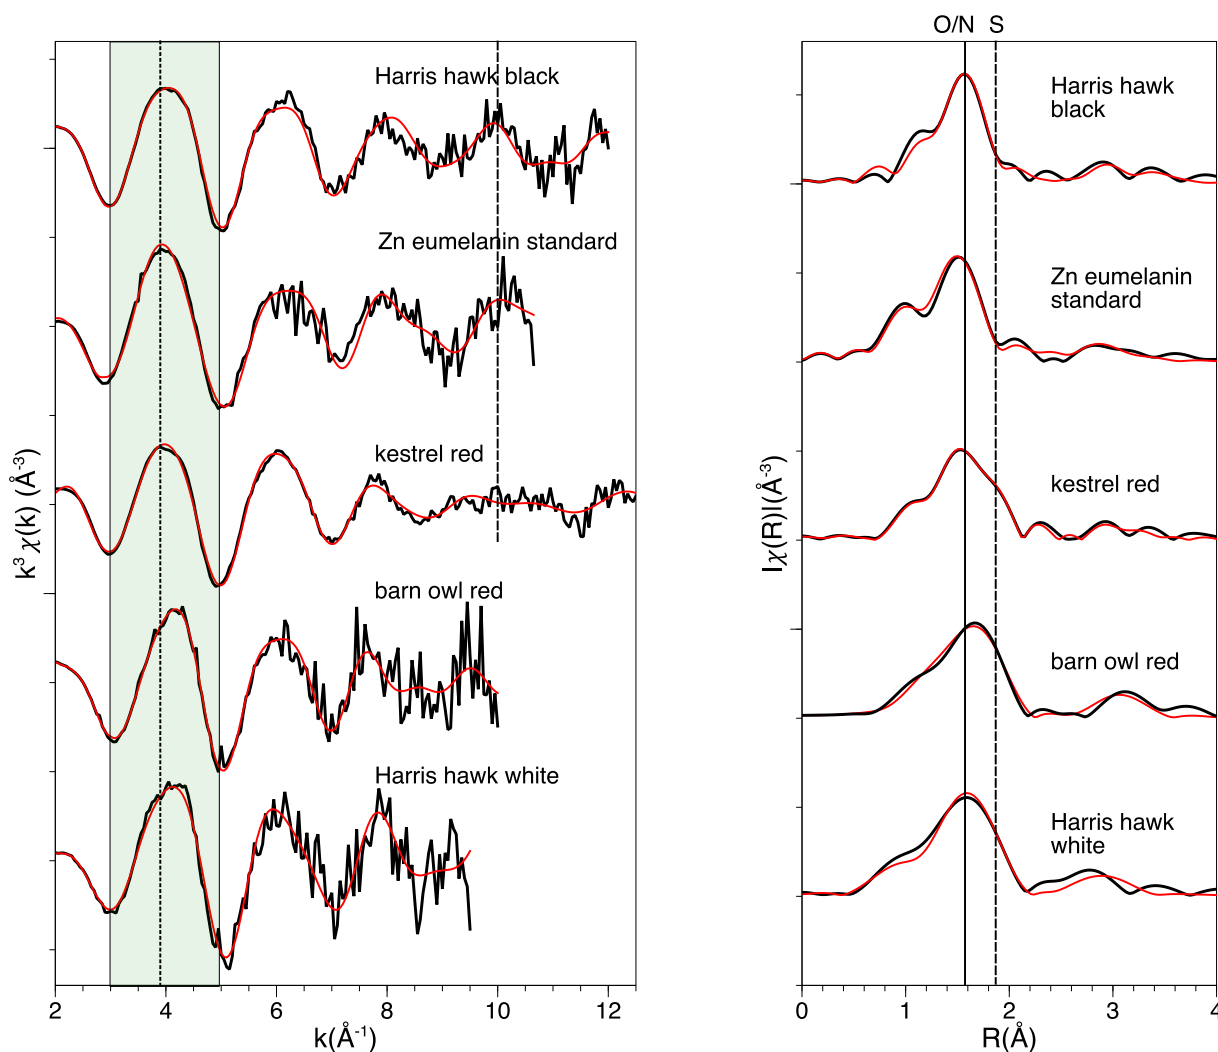

87

88 **Supplementary Figure 5.** Zn K-edge EXAFS spectra  $k^3$ -weighted (left) and their Fourier transform  
 89 (right) of feathers. The Hamilton and F-tests were used to verify the significance of all shells in the  
 90 fitted models. The  $k^3$ -weighted data ranges (left) represent the range of the fitting window of the fitted  
 91 model. Green vertical bar indicates the shifted peak between feathers with a eumelanin component  
 92 compared to feathers that are predominantly pheomelanised. Dotted line in the green bar represents the  
 93 peak shift. Dashed line indicates the presence of a strong peak at  $k=10\text{\AA}^{-1}$  in both the Harris hawk  
 94 black and Zn eumelanin standard, which is absent in the pheomelanised kestrel feather.  
 95 The dominant peak in the RDF (right) represents O/N (solid vertical line), while the presence of S is  
 96 indicated by a distal shoulder on this peak (indicated by the vertical dashed line).  
 97 Due to the extremely low concentrations of Zn in the barn owl and white portion of the Harris hawk  
 98 feathers, the fitting range is limited for those measurements. Once Fourier transformed however, these  
 99 are also consistent with first shell sulfur.

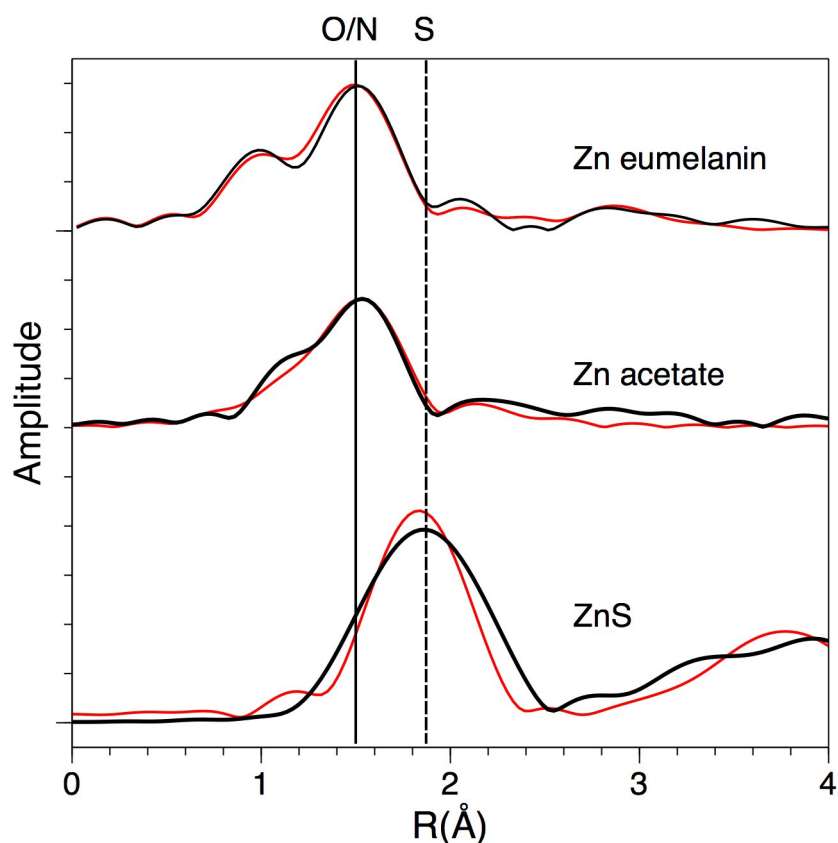

100

101 **Supplementary Figure 6.** Zn K-edge EXAFS Fourier transform of the Zn standards: Zn doped  
 102 eumelanin, Zn acetate, and Zn sulfide (wurtzite). The dominant peak in the eumelanin and acetate  
 103 represents O/N (solid vertical line). This shows that Zn-acetate is a well-constrained Zn-O  
 104 coordination environment, and a ZnS standard provides constraints on Zn-S bonds. The dominant peak  
 105 in the eumelanin and acetate represents O/N (solid vertical line), while the dominant S is indicated by  
 106 a distal shoulder on this peak. This shows that the Zn-eumelanin is purely light element coordinated  
 107 (O/N, solid vertical line) as in the Zn-acetate standard. The dominant peak in the ZnS standard  
 108 (indicated by the vertical dashed line), is due to sulfur in the first shell, and is directly comparable to  
 109 the distal shoulder on the dominant red kestrel peak in Figure S5 (also vertical dashed line) and is a  
 110 clear indicator that Zn in the kestrel feather is bound to first shell sulfur. Because the chemical  
 111 degradation studies show that the red kestrel feathers are over 80% pheomelanin, we interpret this as  
 112 due to pheomelanin complexation.

113



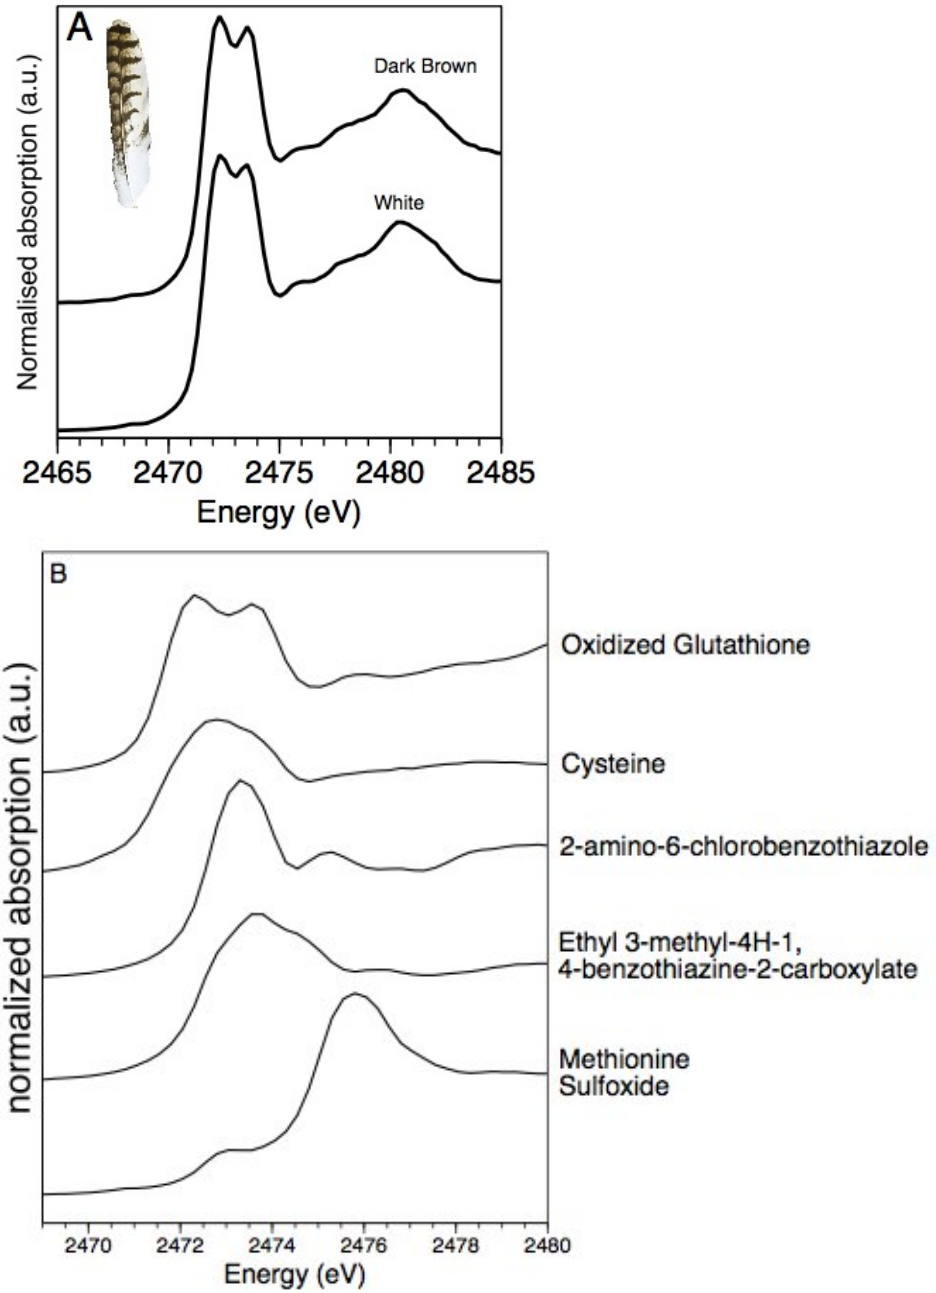

114

115 **Supplementary Figure 7.** S XANES data for A) striped red-tailed hawk, B) sulfur standards.

116

117

118

119

120

121

122

123

124

125 **References**

- 126 1. Ozeki H., Ito S., Wakamatsu K., Thody A.J. Spectrophotometric characterization of eumelanin and  
127 pheomelanin in hair. *Pigm. Cell Res.* **9**, 265-270 (1996).
- 128 2. Wakamatsu K., Ito S., Rees J.L. The usefulness of 4-amino-3-hydroxyphenylalanine as a specific  
129 marker of pheomelanin. *Pigm. Cell Res.* **15**:225-232 (2002).
- 130 3. Ito S., *et al.* Usefulness of alkaline hydrogen peroxide oxidation to analyze eumelanin and  
131 pheomelanin in various tissue samples: application to chemical analysis of human hair melanins. *Pigm*  
132 *Cell. Melanoma Res.* **24**, 605-613 (2011).
- 133 4. Hirobe T, Ito S, Wakamatsu K. The mouse ruby-eye 2d (ru2d/Hps5ru2-d) allele inhibits eumelanin  
134 but not pheomelanin synthesis. *Pigm Cell Melanoma Res* **26**, 723-726 (2013).
- 135 5. Solé V.A., Papillon E., Cotte M., Walter P., Susini J. A multiplatform code for the analysis of  
136 energy-dispersive X-ray fluorescence spectra. *Spectrochim. Acta B* **62**, 63-68 (2007).
